# Supplementary material
Source: PubMed Central journal article supplement (PMC9945691)
Supplement: NIHMS1868873-supplement-1.pdf [file NIHMS1868873-supplement-1.pdf]

**Supplemental Table 1.** Diagnosis and procedure codes used to identify patients undergoing surgery for vascular disease.

|                                  | Diagnoses                                            |                                                             | Procedures                               |                                                                                                                                                                                                                                                                                                              |
|----------------------------------|------------------------------------------------------|-------------------------------------------------------------|------------------------------------------|--------------------------------------------------------------------------------------------------------------------------------------------------------------------------------------------------------------------------------------------------------------------------------------------------------------|
|                                  | ICD-9-CM                                             | ICD-10-CM <sup>a</sup>                                      | ICD-9-CM                                 | ICD-10-CM <sup>a</sup>                                                                                                                                                                                                                                                                                       |
| <b>Abdominal aortic aneurysm</b> | 441.3 – 441.9                                        | I71.3, I71.4, I71.8,<br>I71.9, I79.0                        | Endo: 38.44<br>Open: 39.71               | <b>Endo:</b> 04R047Z, 04R04JZ, 04R04KZ, 04U03JZ, 04U04JZ, 04V03D6, 04V03DZ, 04V04D6, 04V04DZ<br><b>Open:</b> 04R007Z, 04R00JZ, 04R00KZ, 04V00D6, 04V00DZ                                                                                                                                                     |
| <b>Carotid artery stenosis</b>   |                                                      |                                                             |                                          | <b>Endo:</b> 037K346, 037K34Z, 037K356, 037K35Z, 037K366, 037K36Z, 037K376, 037K37Z, 037K3D6, 037K3DZ, 037K3E6, 037K3EZ, 037K3F6, 037K3FZ, 037K3G6, 037K3GZ, 037K3Z6, 037K3ZZ, 037K446, 037K44Z, 037K456, 037K45Z, 037K466, 037K46Z, 037K476, 037K47Z, 037K4D6, 037K4DZ, 037K4E6, 037K4EZ, 037K4F6, 037K4FZ, |
| alone                            | 433.10, 433.30,<br>433.90, 434.00,<br>434.10, 434.90 | I65.21 – I65.23,<br>I65.29, I65.8,<br>I65.9                 | Endo: 00.61, 00.63<br>Open: 38.02, 38.12 |                                                                                                                                                                                                                                                                                                              |
| with stroke                      | 433.11, 433.31,<br>433.91, 434.01,<br>434.11, 434.91 | I63.00, I63.031 –<br>I63.039, I63.10,<br>I63.131 – I63.139, |                                          |                                                                                                                                                                                                                                                                                                              |

|                                        |                         |                                                                    |                                               |                                                                                                                                                                                                                                                                                                                                                                                                                                                                                                                      |
|----------------------------------------|-------------------------|--------------------------------------------------------------------|-----------------------------------------------|----------------------------------------------------------------------------------------------------------------------------------------------------------------------------------------------------------------------------------------------------------------------------------------------------------------------------------------------------------------------------------------------------------------------------------------------------------------------------------------------------------------------|
|                                        |                         | I63.20, I63.231 –<br>I63.239, I63.29,<br>I63.30 – I63.9            |                                               | 037K4G6, 037K4GZ, 037K4Z6, 037K4ZZ,<br>037L346, 037L34Z, 037L366, 037L36Z,<br>037L376, 037L37Z, 037L3D6, 037L3DZ,<br>037L3E6, 037L3EZ, 037L3F6, 037L3FZ,<br>037L3G6, 037L3GZ, 037L3Z6, 037L3ZZ,<br>037L446, 037L44Z, 037L456, 037L45Z,<br>037L466, 037L46Z, 037L476, 037L47Z,<br>037L4D6, 037L4DZ, 037L4E6, 037L4EZ,<br>037L4F6, 037L4FZ, 037L4G6, 037L4GZ,<br>037L4Z6, 037L4ZZ, 03CK3Z6, 03CK3ZZ,<br>03CK4Z6, 03CK4ZZ, 03CL3Z6, 03CL3ZZ,<br>03CL4Z6, 03CL4ZZ<br><br><b>Open:</b> 03CK0Z6, 03CK0ZZ, 03CL0Z6, 03CL0ZZ |
| with TIA                               | 435.0 – 435.9,<br>781.4 | G45.1, G45.2,<br>G45.8, G45.9,<br>G46.0 – G46.2,<br>I67.841, R29.5 |                                               |                                                                                                                                                                                                                                                                                                                                                                                                                                                                                                                      |
| with Amaurosis<br>fugax                | 362.34, 368.12          | G43.5, H34.00 –<br>H34.03, H53.121 –<br>H53.123, H53.129           |                                               |                                                                                                                                                                                                                                                                                                                                                                                                                                                                                                                      |
| <b>Peripheral<br/>arterial disease</b> | 440.2 – 440.4,<br>443.9 | I70.201 – I70.799,<br>I70.92, I73.9                                | Endo: 00.55,<br>00.60, 17.56, 39.50,<br>39.90 | <b>Endo:</b> 047K341, 047K346, 047K34Z, 047K356,<br>047K35Z, 047K366, 047K36Z, 047K376,<br>047K37Z, 047K3D1, 047K3D6, 047K3DZ,                                                                                                                                                                                                                                                                                                                                                                                       |

|  |  |  |                               |                                                                                                                                                                                                                                                                                                                                                                                                                                                                                                                                                                                                                                              |
|--|--|--|-------------------------------|----------------------------------------------------------------------------------------------------------------------------------------------------------------------------------------------------------------------------------------------------------------------------------------------------------------------------------------------------------------------------------------------------------------------------------------------------------------------------------------------------------------------------------------------------------------------------------------------------------------------------------------------|
|  |  |  | Open: 38.48, 39.25,<br>39.29, | 047K3E6, 047K3EZ, 047K3F6, 047K3FZ,<br>047K3G6, 047K3GZ, 047K3Z1, 047K3Z6,<br>047K3ZZ, 047K441, 047K446, 047K44Z,<br>047K456, 047K45Z, 047K466, 047K46Z,<br>047K476, 047K47Z, 047K4D1, 047K4D6,<br>047K4DZ, 047K4E6, 047K4EZ, 047K4F6,<br>047K4FZ, 047K4G6, 047K4GZ, 047K4Z1,<br>047K4Z6, 047K4ZZ, 047L341, 047L346,<br>047L34Z, 047L356, 047L35Z, 047L366,<br>047L36Z, 047L376, 047L37Z, 047L3D1,<br>047L3D6, 047L3DZ, 047L3E6, 047L3EZ,<br>047L3F6, 047L3FZ, 047L3G6, 047L3GZ,<br>047L3Z1, 047L3Z6, 047L3ZZ, 047L441,<br>047L446, 047L44Z, 047L456, 047L45Z,<br>047L466, 047L46Z, 047L476, 047L47Z,<br>047L4D1, 047L4D6, 047L4DZ, 047L4E6, |
|--|--|--|-------------------------------|----------------------------------------------------------------------------------------------------------------------------------------------------------------------------------------------------------------------------------------------------------------------------------------------------------------------------------------------------------------------------------------------------------------------------------------------------------------------------------------------------------------------------------------------------------------------------------------------------------------------------------------------|

|  |  |  |  |                                                                                                                                                                                                                                                                                                                                                                                                                                                                                                                                                                                                                                              |
|--|--|--|--|----------------------------------------------------------------------------------------------------------------------------------------------------------------------------------------------------------------------------------------------------------------------------------------------------------------------------------------------------------------------------------------------------------------------------------------------------------------------------------------------------------------------------------------------------------------------------------------------------------------------------------------------|
|  |  |  |  | 047L4EZ, 047L4F6, 047L4FZ, 047L4G6,<br>047L4GZ, 047L4Z1, 047L4Z6, 047L4ZZ,<br>047M341, 047M346, 047M34Z, 047M356,<br>047M35Z, 047M366, 047M36Z, 047M376,<br>047M37Z, 047M3D1, 047M3D6, 047M3DZ,<br>047M3E6, 047M3EZ, 047M3F6, 047M3FZ,<br>047M3G6, 047M3GZ, 047M3Z1, 047M3Z6,<br>047M3ZZ, 047M441, 047M446, 047M44Z,<br>047M456, 047M45Z, 047M466, 047M46Z,<br>047M476, 047M47Z, 047M4D1, 047M4D6,<br>047M4DZ, 047M4E6, 047M4EZ, 047M4F6,<br>047M4FZ, 047M4G6, 047M4GZ, 047M4Z1,<br>047M4Z6, 047M4ZZ, 047N341, 047N346,<br>047N34Z, 047N356, 047N35Z, 047N366,<br>047N36Z, 047N376, 047N37Z, 047N3D1,<br>047N3D6, 047N3DZ, 047N3E6, 047N3EZ, |
|--|--|--|--|----------------------------------------------------------------------------------------------------------------------------------------------------------------------------------------------------------------------------------------------------------------------------------------------------------------------------------------------------------------------------------------------------------------------------------------------------------------------------------------------------------------------------------------------------------------------------------------------------------------------------------------------|

|  |  |  |  |                                                                                                                                                                                                                                                                                                                                                                                                                                                                                                                                                                                                                                                                                  |
|--|--|--|--|----------------------------------------------------------------------------------------------------------------------------------------------------------------------------------------------------------------------------------------------------------------------------------------------------------------------------------------------------------------------------------------------------------------------------------------------------------------------------------------------------------------------------------------------------------------------------------------------------------------------------------------------------------------------------------|
|  |  |  |  | 047N3F6, 047N3FZ, 047N3G6, 047N3GZ,<br>047N3Z1, 047N3Z6, 047N3ZZ, 047N441,<br>047N446, 047N44Z, 047N456, 047N45Z,<br>047N466, 047N46Z, 047N476, 047N47Z,<br>047N4D1, 047N4D6, 047N4DZ, 047N4E6,<br>047N4EZ, 047N4F6, 047N4FZ, 047N4G6,<br>047N4GZ, 047N4Z1, 047N4Z6, 047N4ZZ,<br>047P341, 047P346, 047P34Z, 047P356, 047P35Z,<br>047P366, 047P36Z, 047P376, 047P37Z, 047P3D1,<br>047P3D6, 047P3DZ, 047P3E6, 047P3EZ,<br>047P3F6, 047P3FZ, 047P3G6, 047P3GZ,<br>047P3Z1, 047P3Z6, 047P3ZZ, 047P441, 047P446,<br>047P44Z, 047P456, 047P45Z, 047P466, 047P46Z,<br>047P476, 047P47Z, 047P4D1, 047P4D6,<br>047P4DZ, 047P4E6, 047P4EZ, 047P4F6,<br>047P4FZ, 047P4G6, 047P4GZ, 047P4Z1, |
|--|--|--|--|----------------------------------------------------------------------------------------------------------------------------------------------------------------------------------------------------------------------------------------------------------------------------------------------------------------------------------------------------------------------------------------------------------------------------------------------------------------------------------------------------------------------------------------------------------------------------------------------------------------------------------------------------------------------------------|

|  |  |  |  |                                                                                                                                                                                                                                                                                                                                                                                                                                                                                                                                                                                                                                              |
|--|--|--|--|----------------------------------------------------------------------------------------------------------------------------------------------------------------------------------------------------------------------------------------------------------------------------------------------------------------------------------------------------------------------------------------------------------------------------------------------------------------------------------------------------------------------------------------------------------------------------------------------------------------------------------------------|
|  |  |  |  | 047P4Z6, 047P4ZZ, 047Q341, 047Q346,<br>047Q34Z, 047Q356, 047Q35Z, 047Q366,<br>047Q36Z, 047Q376, 047Q37Z, 047Q3D1,<br>047Q3D6, 047Q3DZ, 047Q3E6, 047Q3EZ,<br>047Q3F6, 047Q3FZ, 047Q3G6, 047Q3GZ,<br>047Q3Z1, 047Q3Z6, 047Q3ZZ, 047Q441,<br>047Q446, 047Q44Z, 047Q456, 047Q45Z,<br>047Q466, 047Q46Z, 047Q476, 047Q47Z,<br>047Q4D1, 047Q4D6, 047Q4DZ, 047Q4E6,<br>047Q4EZ, 047Q4F6, 047Q4FZ, 047Q4G6,<br>047Q4GZ, 047Q4Z1, 047Q4Z6, 047Q4ZZ,<br>047R341, 047R346, 047R34Z, 047R356,<br>047R35Z, 047R366, 047R36Z, 047R376,<br>047R37Z, 047R3D1, 047R3D6, 047R3DZ,<br>047R3E6, 047R3EZ, 047R3F6, 047R3FZ,<br>047R3G6, 047R3GZ, 047R3Z1, 047R3Z6, |
|--|--|--|--|----------------------------------------------------------------------------------------------------------------------------------------------------------------------------------------------------------------------------------------------------------------------------------------------------------------------------------------------------------------------------------------------------------------------------------------------------------------------------------------------------------------------------------------------------------------------------------------------------------------------------------------------|

|  |  |  |  |                                                                                                                                                                                                                                                                                                                                                                                                                                                                                                                                                                                                                                                                         |
|--|--|--|--|-------------------------------------------------------------------------------------------------------------------------------------------------------------------------------------------------------------------------------------------------------------------------------------------------------------------------------------------------------------------------------------------------------------------------------------------------------------------------------------------------------------------------------------------------------------------------------------------------------------------------------------------------------------------------|
|  |  |  |  | 047R3ZZ, 047R441, 047R446, 047R44Z,<br>047R456, 047R45Z, 047R466, 047R46Z,<br>047R476, 047R47Z, 047R4D1, 047R4D6,<br>047R4DZ, 047R4E6, 047R4EZ, 047R4F6,<br>047R4FZ, 047R4G6, 047R4GZ, 047R4Z1,<br>047R4Z6, 047R4ZZ, 047S341, 047S346,<br>047S34Z, 047S356, 047S35Z, 047S366, 047S36Z,<br>047S376, 047S37Z, 047S3D1, 047S3D6,<br>047S3DZ, 047S3E6, 047S3EZ, 047S3F6,<br>047S3FZ, 047S3G6, 047S3GZ, 047S3Z1,<br>047S3Z6, 047S3ZZ, 047S441, 047S446, 047S44Z,<br>047S456, 047S45Z, 047S466, 047S46Z, 047S476,<br>047S47Z, 047S4D1, 047S4D6, 047S4DZ,<br>047S4E6, 047S4EZ, 047S4F6, 047S4FZ,<br>047S4G6, 047S4GZ, 047S4Z1, 047S4Z6,<br>047S4ZZ, 047T341, 047T346, 047T34Z, |
|--|--|--|--|-------------------------------------------------------------------------------------------------------------------------------------------------------------------------------------------------------------------------------------------------------------------------------------------------------------------------------------------------------------------------------------------------------------------------------------------------------------------------------------------------------------------------------------------------------------------------------------------------------------------------------------------------------------------------|

|  |  |  |  |                                                                                                                                                                                                                                                                                                                                                                                                                                                                                                                                                                                                                                              |
|--|--|--|--|----------------------------------------------------------------------------------------------------------------------------------------------------------------------------------------------------------------------------------------------------------------------------------------------------------------------------------------------------------------------------------------------------------------------------------------------------------------------------------------------------------------------------------------------------------------------------------------------------------------------------------------------|
|  |  |  |  | 047T356, 047T35Z, 047T366, 047T36Z,<br>047T376, 047T37Z, 047T3D1, 047T3D6,<br>047T3DZ, 047T3E6, 047T3EZ, 047T3F6,<br>047T3FZ, 047T3G6, 047T3GZ, 047T3Z1,<br>047T3Z6, 047T3ZZ, 047T441, 047T446,<br>047T44Z, 047T456, 047T45Z, 047T466,<br>047T46Z, 047T476, 047T47Z, 047T4D1,<br>047T4D6, 047T4DZ, 047T4E6, 047T4EZ,<br>047T4F6, 047T4FZ, 047T4G6, 047T4GZ,<br>047T4Z1, 047T4Z6, 047T4ZZ, 047U341,<br>047U346, 047U34Z, 047U356, 047U35Z,<br>047U366, 047U36Z, 047U376, 047U37Z,<br>047U3D1, 047U3D6, 047U3DZ, 047U3E6,<br>047U3EZ, 047U3F6, 047U3FZ, 047U3G6,<br>047U3GZ, 047U3Z1, 047U3Z6, 047U3ZZ,<br>047U441, 047U446, 047U44Z, 047U456, |
|--|--|--|--|----------------------------------------------------------------------------------------------------------------------------------------------------------------------------------------------------------------------------------------------------------------------------------------------------------------------------------------------------------------------------------------------------------------------------------------------------------------------------------------------------------------------------------------------------------------------------------------------------------------------------------------------|



|  |  |  |  |                                                                                                                                                                                                                                                                                                                                                                                                                                                                                                                                                                                                                                              |
|--|--|--|--|----------------------------------------------------------------------------------------------------------------------------------------------------------------------------------------------------------------------------------------------------------------------------------------------------------------------------------------------------------------------------------------------------------------------------------------------------------------------------------------------------------------------------------------------------------------------------------------------------------------------------------------------|
|  |  |  |  | 047U45Z, 047U466, 047U46Z, 047U476,<br>047U47Z, 047U4D1, 047U4D6, 047U4DZ,<br>047U4E6, 047U4EZ, 047U4F6, 047U4FZ,<br>047U4G6, 047U4GZ, 047U4Z1, 047U4Z6,<br>047U4ZZ, 047V341, 047V346, 047V34Z,<br>047V356, 047V35Z, 047V366, 047V36Z,<br>047V376, 047V37Z, 047V3D1, 047V3D6,<br>047V3DZ, 047V3E6, 047V3EZ, 047V3F6,<br>047V3FZ, 047V3G6, 047V3GZ, 047V3Z1,<br>047V3Z6, 047V3ZZ, 047V441, 047V446,<br>047V44Z, 047V456, 047V45Z, 047V466,<br>047V46Z, 047V476, 047V47Z, 047V4D1,<br>047V4D6, 047V4DZ, 047V4E6, 047V4EZ,<br>047V4F6, 047V4FZ, 047V4G6, 047V4GZ,<br>047V4Z1, 047V4Z6, 047V4ZZ, 047W341,<br>047W346, 047W34Z, 047W356, 047W35Z, |
|--|--|--|--|----------------------------------------------------------------------------------------------------------------------------------------------------------------------------------------------------------------------------------------------------------------------------------------------------------------------------------------------------------------------------------------------------------------------------------------------------------------------------------------------------------------------------------------------------------------------------------------------------------------------------------------------|

|  |  |  |  |                                                                                                                                                                                                                                                                                                                                                                                                                                                                                                                                                                                                                                              |
|--|--|--|--|----------------------------------------------------------------------------------------------------------------------------------------------------------------------------------------------------------------------------------------------------------------------------------------------------------------------------------------------------------------------------------------------------------------------------------------------------------------------------------------------------------------------------------------------------------------------------------------------------------------------------------------------|
|  |  |  |  | 047W366, 047W36Z, 047W376, 047W37Z,<br>047W3D1, 047W3D6, 047W3DZ, 047W3E6,<br>047W3EZ, 047W3F6, 047W3FZ, 047W3G6,<br>047W3GZ, 047W3Z1, 047W3Z6, 047W3ZZ,<br>047W441, 047W446, 047W44Z, 047W456,<br>047W45Z, 047W466, 047W46Z, 047W476,<br>047W47Z, 047W4D1, 047W4D6, 047W4DZ,<br>047W4E6, 047W4EZ, 047W4F6, 047W4FZ,<br>047W4G6, 047W4GZ, 047W4Z1, 047W4Z6,<br>047W4ZZ, 047Y341, 047Y346, 047Y34Z,<br>047Y356, 047Y35Z, 047Y366, 047Y36Z,<br>047Y376, 047Y37Z, 047Y3D1, 047Y3D6,<br>047Y3DZ, 047Y3E6, 047Y3EZ, 047Y3F6,<br>047Y3FZ, 047Y3G6, 047Y3GZ, 047Y3Z1,<br>047Y3Z6, 047Y3ZZ, 047Y441, 047Y446,<br>047Y44Z, 047Y456, 047Y45Z, 047Y466, |
|--|--|--|--|----------------------------------------------------------------------------------------------------------------------------------------------------------------------------------------------------------------------------------------------------------------------------------------------------------------------------------------------------------------------------------------------------------------------------------------------------------------------------------------------------------------------------------------------------------------------------------------------------------------------------------------------|

|  |  |  |  |                                                                                                                                                                                                                                                                                                                                                                                                                                                                                                                                                                                                                   |
|--|--|--|--|-------------------------------------------------------------------------------------------------------------------------------------------------------------------------------------------------------------------------------------------------------------------------------------------------------------------------------------------------------------------------------------------------------------------------------------------------------------------------------------------------------------------------------------------------------------------------------------------------------------------|
|  |  |  |  | 047Y46Z, 047Y476, 047Y47Z, 047Y4D1,<br>047Y4D6, 047Y4DZ, 047Y4E6, 047Y4EZ,<br>047Y4F6, 047Y4FZ, 047Y4G6, 047Y4GZ,<br>047Y4Z1, 047Y4Z6, 047Y4ZZ,<br>04CK3Z6, 04CK3ZZ, 04CL3Z6, 04CL3ZZ,<br>04CM3Z6, 04CM3ZZ, 04CN3Z6, 04CN3ZZ,<br>04CP3Z6, 04CP3ZZ, 04CQ3Z6, 04CQ3ZZ,<br>04CR3Z6, 04CR3ZZ, 04CS3Z6, 04CS3ZZ,<br>04CT3Z6, 04CT3ZZ, 04CU3Z6, 04CU3ZZ,<br>04CV3Z6, 04CV3ZZ, 04CW3Z6, 04CW3ZZ,<br>04CY3Z6, 04CY3ZZ,<br>04RK47Z, 04RK4JZ, 04RK4KZ, 04RL47Z,<br>04RL4JZ, 04RL4KZ, 04RM47Z, 04RM4JZ,<br>04RM4KZ, 04RN47Z, 04RN4JZ, 04RN4KZ,<br>04RP47Z, 04RP4JZ, 04RP4KZ, 04RQ47Z,<br>04RQ4JZ, 04RQ4KZ, 04RR47Z, 04RR4JZ, |
|--|--|--|--|-------------------------------------------------------------------------------------------------------------------------------------------------------------------------------------------------------------------------------------------------------------------------------------------------------------------------------------------------------------------------------------------------------------------------------------------------------------------------------------------------------------------------------------------------------------------------------------------------------------------|

|  |  |  |  |                                                                                                                                                                                                                                                                                                                                                                                                                                                                                                                                                                                                                                                                           |
|--|--|--|--|---------------------------------------------------------------------------------------------------------------------------------------------------------------------------------------------------------------------------------------------------------------------------------------------------------------------------------------------------------------------------------------------------------------------------------------------------------------------------------------------------------------------------------------------------------------------------------------------------------------------------------------------------------------------------|
|  |  |  |  | <p>04RR4KZ, 04RS47Z, 04RS4JZ, 04RS4KZ,<br/>04RT47Z, 04RT4JZ, 04RT4KZ, 04RU47Z,<br/>04RU4JZ, 04RU4KZ, 04RV47Z, 04RV4JZ,<br/>04RV4KZ, 04RW47Z, 04RW4JZ, 04RW4KZ,<br/>04RY47Z, 04RY4JZ, 04RY4KZ,</p> <p><b>Open:</b> 041K09H, 041K09J, 041K09K, 041K09L,<br/>041K09M, 041K09N, 041K09P, 041K09Q,<br/>041K09S, 041K0AH, 041K0AJ, 041K0AK,<br/>041K0AL, 041K0AM, 041K0AN, 041K0AP,<br/>041K0AQ, 041K0AS, 041K0JH, 041K0JJ,<br/>041K0JK, 041K0JL, 041K0JM, 041K0JN,<br/>041K0JP, 041K0JQ, 041K0JS, 041K0KH,<br/>041K0KJ, 041K0KK, 041K0KL, 041K0KM,<br/>041K0KN, 041K0KP, 041K0KQ, 041K0KS,<br/>041K0ZH, 041K0ZJ, 041K0ZK, 041K0ZL,<br/>041K0ZM, 041K0ZN, 041K0ZP, 041K0ZQ,</p> |
|--|--|--|--|---------------------------------------------------------------------------------------------------------------------------------------------------------------------------------------------------------------------------------------------------------------------------------------------------------------------------------------------------------------------------------------------------------------------------------------------------------------------------------------------------------------------------------------------------------------------------------------------------------------------------------------------------------------------------|

|  |  |  |  |                                                                                                                                                                                                                                                                                                                                                                                                                                                                                                                                                                                                                                              |
|--|--|--|--|----------------------------------------------------------------------------------------------------------------------------------------------------------------------------------------------------------------------------------------------------------------------------------------------------------------------------------------------------------------------------------------------------------------------------------------------------------------------------------------------------------------------------------------------------------------------------------------------------------------------------------------------|
|  |  |  |  | 041K0ZS, 041K49H, 041K49J, 041K49K,<br>041K49L, 041K49M, 041K49N, 041K49P,<br>041K49Q, 041K49S, 041K4AH, 041K4AJ,<br>041K4AK, 041K4AL, 041K4AM, 041K4AN,<br>041K4AP, 041K4AQ, 041K4AS, 041K4JH,<br>041K4JJ, 041K4JK, 041K4JL, 041K4JM,<br>041K4JN, 041K4JP, 041K4JQ, 041K4JS,<br>041K49H, 041K49J, 041K49K, 041K49L,<br>041K49M, 041K49N, 041K49P, 041K49Q,<br>041K49S, 041K4KH, 041K4KJ, 041K4KK,<br>041K4KL, 041K4KM, 041K4KN, 041K4KP,<br>041K4KQ, 041K4KS, 041K4ZH, 041K4ZJ,<br>041K4ZK, 041K4ZL, 041K4ZM, 041K4ZN,<br>041K4ZP, 041K4ZQ, 041K4ZS, 041L09H,<br>041L09J, 041L09K, 041L09L, 041L09M,<br>041L09N, 041L09P, 041L09Q, 041L09S, |
|--|--|--|--|----------------------------------------------------------------------------------------------------------------------------------------------------------------------------------------------------------------------------------------------------------------------------------------------------------------------------------------------------------------------------------------------------------------------------------------------------------------------------------------------------------------------------------------------------------------------------------------------------------------------------------------------|

|  |  |  |  |                                                                                                                                                                                                                                                                                                                                                                                                                                                                                                                                                                                                                                              |
|--|--|--|--|----------------------------------------------------------------------------------------------------------------------------------------------------------------------------------------------------------------------------------------------------------------------------------------------------------------------------------------------------------------------------------------------------------------------------------------------------------------------------------------------------------------------------------------------------------------------------------------------------------------------------------------------|
|  |  |  |  | 041L0AH, 041L0AJ, 041L0AK, 041L0AL,<br>041L0AM, 041L0AN, 041L0AP, 041L0AQ,<br>041L0AS, 041L0JH, 041L0JJ, 041L0JK,<br>041L0JL, 041L0JM, 041L0JN, 041L0JP,<br>041L0JQ, 041L0JS, 041L0KH, 041L0KJ,<br>041L0KK, 041L0KL, 041L0KM, 041L0KN,<br>041L0KP, 041L0KQ, 041L0KS, 041L0ZH,<br>041L0ZJ, 041L0ZK, 041L0ZL, 041L0ZM,<br>041L0ZN, 041L0ZP, 041L0ZQ, 041L0ZS,<br>041L49H, 041L49J, 041L49K, 041L49L,<br>041L49M, 041L49N, 041L49P, 041L49Q,<br>041L49S, 041L4AH, 041L4AJ, 041L4AK,<br>041L4AL, 041L4AM, 041L4AN, 041L4AP,<br>041L4AQ, 041L4AS, 041L4JH, 041L4JJ,<br>041L4JK, 041L4JL, 041L4JM, 041L4JN,<br>041L4JP, 041L4JQ, 041L4JS, 041L4KH, |
|--|--|--|--|----------------------------------------------------------------------------------------------------------------------------------------------------------------------------------------------------------------------------------------------------------------------------------------------------------------------------------------------------------------------------------------------------------------------------------------------------------------------------------------------------------------------------------------------------------------------------------------------------------------------------------------------|

|  |  |  |  |                                                                                                                                                                                                                                                                                                                                                                                                                                                                                                                                                                                                                                              |
|--|--|--|--|----------------------------------------------------------------------------------------------------------------------------------------------------------------------------------------------------------------------------------------------------------------------------------------------------------------------------------------------------------------------------------------------------------------------------------------------------------------------------------------------------------------------------------------------------------------------------------------------------------------------------------------------|
|  |  |  |  | 041L4KJ, 041L4KK, 041L4KL, 041L4KM,<br>041L4KN, 041L4KP, 041L4KQ, 041L4KS,<br>041L4ZH, 041L4ZJ, 041L4ZK, 041L4ZL,<br>041L4ZM, 041L4ZN, 041L4ZP, 041L4ZQ,<br>041L4ZS, 041M09L, 041M09M, 041M09P,<br>041M09Q, 041M09S, 041M0AL, 041M0AM,<br>041M0AP, 041M0AQ, 041M0AS, 041M0JL,<br>041M0JM, 041M0JP, 041M0JQ, 041M0JS,<br>041M0KL, 041M0KM, 041M0KP, 041M0KQ,<br>041M0KS, 041M0ZL, 041M0ZM, 041M0ZP,<br>041M0ZQ, 041M0ZS, 041M49L, 041M49M,<br>041M49P, 041M49Q, 041M49S, 041M4AL,<br>041M4AM, 041M4AP, 041M4AQ, 041M4AS,<br>041M4JL, 041M4JM, 041M4JP, 041M4JQ,<br>041M4JS, 041M4KL, 041M4KM, 041M4KP,<br>041M4KQ, 041M4KS, 041M4ZL, 041M4ZM, |
|--|--|--|--|----------------------------------------------------------------------------------------------------------------------------------------------------------------------------------------------------------------------------------------------------------------------------------------------------------------------------------------------------------------------------------------------------------------------------------------------------------------------------------------------------------------------------------------------------------------------------------------------------------------------------------------------|

|  |  |  |  |                                                                                                                                                                                                                                                                                                                                                                                                                                                                                                                                                                                                                                              |
|--|--|--|--|----------------------------------------------------------------------------------------------------------------------------------------------------------------------------------------------------------------------------------------------------------------------------------------------------------------------------------------------------------------------------------------------------------------------------------------------------------------------------------------------------------------------------------------------------------------------------------------------------------------------------------------------|
|  |  |  |  | 041M4ZP, 041M4ZQ, 041M4ZS, 041N09L,<br>041N09M, 041N09P, 041N09Q, 041N09S,<br>041N0AL, 041N0AM, 041N0AP, 041N0AQ,<br>041N0AS, 041N0JL, 041N0JM, 041N0JP,<br>041N0JQ, 041N0JS, 041N0KL, 041N0KM,<br>041N0KP, 041N0KQ, 041N0KS, 041N0ZL,<br>041N0ZM, 041N0ZP, 041N0ZQ, 041N0ZS,<br>041N49L, 041N49M, 041N49P, 041N49Q,<br>041N49S, 041N4AL, 041N4AM, 041N4AP,<br>041N4AQ, 041N4AS, 041N4JL, 041N4JM,<br>041N4JP, 041N4JQ, 041N4JS, 041N4KL,<br>041N4KM, 041N4KP, 041N4KQ, 041N4KS,<br>041N4ZL, 041N4ZM, 041N4ZP, 041N4ZQ,<br>041N4ZS, 041T09P, 041T09Q, 041T09S,<br>041T0AP, 041T0AQ, 041T0AS, 041T0JP,<br>041T0JQ, 041T0JS, 041T0KP, 041T0KQ, |
|--|--|--|--|----------------------------------------------------------------------------------------------------------------------------------------------------------------------------------------------------------------------------------------------------------------------------------------------------------------------------------------------------------------------------------------------------------------------------------------------------------------------------------------------------------------------------------------------------------------------------------------------------------------------------------------------|



|  |  |  |  |                                                                                                                                                                                                                                                                                                                                                                                                                                                                                                                                                                                                                                              |
|--|--|--|--|----------------------------------------------------------------------------------------------------------------------------------------------------------------------------------------------------------------------------------------------------------------------------------------------------------------------------------------------------------------------------------------------------------------------------------------------------------------------------------------------------------------------------------------------------------------------------------------------------------------------------------------------|
|  |  |  |  | 041T0KS, 041T0ZP, 041T0ZQ, 041T0ZS,<br>041T49P, 041T49Q, 041T49S, 041T4AP,<br>041T4AQ, 041T4AS, 041T4JP, 041T4JQ,<br>041T4JS, 041T4KP, 041T4KQ, 041T4KS,<br>041T4ZP, 041T4ZQ, 041T4ZS, 041U09P,<br>041U09Q, 041U09S, 041U0AP, 041U0AQ,<br>041U0AS, 041U0JP, 041U0JQ, 041U0JS,<br>041U0KP, 041U0KQ, 041U0KS, 041U0ZP,<br>041U0ZQ, 041U0ZS, 041U49P, 041U49Q,<br>041U49S, 041U4AP, 041U4AQ, 041U4AS,<br>041U4JP, 041U4JQ, 041U4JS, 041U4KP,<br>041U4KQ, 041U4KS, 041U4ZP, 041U4ZQ,<br>041U4ZS, 041V09P, 041V09Q, 041V09S,<br>041V0AP, 041V0AQ, 041V0AS, 041V0JP,<br>041V0JQ, 041V0JS, 041V0KP, 041V0KQ,<br>041V0KS, 041V0ZP, 041V0ZQ, 041V0ZS, |
|--|--|--|--|----------------------------------------------------------------------------------------------------------------------------------------------------------------------------------------------------------------------------------------------------------------------------------------------------------------------------------------------------------------------------------------------------------------------------------------------------------------------------------------------------------------------------------------------------------------------------------------------------------------------------------------------|

|  |  |  |  |                                                                                                                                                                                                                                                                                                                                                                                                                                                                                                                                                                                                                                           |
|--|--|--|--|-------------------------------------------------------------------------------------------------------------------------------------------------------------------------------------------------------------------------------------------------------------------------------------------------------------------------------------------------------------------------------------------------------------------------------------------------------------------------------------------------------------------------------------------------------------------------------------------------------------------------------------------|
|  |  |  |  | <p>041V49P, 041V49Q, 041V49S, 041V4AP,<br/>041V4AQ, 041V4AS, 041V4JP, 041V4JQ,<br/>041V4JS, 041V4KP, 041V4KQ, 041V4KS,<br/>041V4ZP, 041V4ZQ, 041V4ZS, 041W09P,<br/>041W09Q, 041W09S, 041W0AP, 041W0AQ,<br/>041W0AS, 041W0JP, 041W0JQ, 041W0JS,<br/>041W0KP, 041W0KQ, 041W0KS, 041W0ZP,<br/>041W0ZQ, 041W0ZS, 041W49P, 041W49Q,<br/>041W49S, 041W4AP, 041W4AQ, 041W4AS,<br/>041W4JP, 041W4JQ, 041W4JS, 041W4KP,<br/>041W4KQ, 041W4KS, 041W4ZP, 041W4ZQ,<br/>041W4ZS</p> <p>047K041, 047K046, 047K04Z, 047K056,<br/>047K05Z, 047K066, 047K06Z, 047K076,<br/>047K07Z, 047K0D1, 047K0D6, 047K0DZ,<br/>047K0E6, 047K0EZ, 047K0F6, 047K0FZ,</p> |
|--|--|--|--|-------------------------------------------------------------------------------------------------------------------------------------------------------------------------------------------------------------------------------------------------------------------------------------------------------------------------------------------------------------------------------------------------------------------------------------------------------------------------------------------------------------------------------------------------------------------------------------------------------------------------------------------|

|  |  |  |  |                                                                                                                                                                                                                                                                                                                                                                                                                                                                                                                                                                                                                                              |
|--|--|--|--|----------------------------------------------------------------------------------------------------------------------------------------------------------------------------------------------------------------------------------------------------------------------------------------------------------------------------------------------------------------------------------------------------------------------------------------------------------------------------------------------------------------------------------------------------------------------------------------------------------------------------------------------|
|  |  |  |  | 047K0G6, 047K0GZ, 047K0Z1, 047K0Z6,<br>047K0ZZ, 047L041, 047L046, 047L04Z,<br>047L056, 047L05Z, 047L066, 047L06Z,<br>047L076, 047L07Z, 047L0D1, 047L0D6,<br>047L0DZ, 047L0E6, 047L0EZ, 047L0F6,<br>047L0FZ, 047L0G6, 047L0GZ, 047L0Z1,<br>047L0Z6, 047L0ZZ, 047M041, 047M046,<br>047M04Z, 047M056, 047M05Z, 047M066,<br>047M06Z, 047M076, 047M07Z, 047M0D1,<br>047M0D6, 047M0DZ, 047M0E6, 047M0EZ,<br>047M0F6, 047M0FZ, 047M0G6, 047M0GZ,<br>047M0Z1, 047M0Z6, 047M0ZZ, 047N041,<br>047N046, 047N04Z, 047N056, 047N05Z,<br>047N066, 047N06Z, 047N076, 047N07Z,<br>047N0D1, 047N0D6, 047N0DZ, 047N0E6,<br>047N0EZ, 047N0F6, 047N0FZ, 047N0G6, |
|--|--|--|--|----------------------------------------------------------------------------------------------------------------------------------------------------------------------------------------------------------------------------------------------------------------------------------------------------------------------------------------------------------------------------------------------------------------------------------------------------------------------------------------------------------------------------------------------------------------------------------------------------------------------------------------------|

|  |  |  |  |                                                                                                                                                                                                                                                                                                                                                                                                                                                                                                                                                                                                                                                                |
|--|--|--|--|----------------------------------------------------------------------------------------------------------------------------------------------------------------------------------------------------------------------------------------------------------------------------------------------------------------------------------------------------------------------------------------------------------------------------------------------------------------------------------------------------------------------------------------------------------------------------------------------------------------------------------------------------------------|
|  |  |  |  | 047N0GZ, 047N0Z1, 047N0Z6, 047N0ZZ,<br>047P041, 047P046, 047P04Z, 047P056, 047P05Z,<br>047P066, 047P06Z, 047P076, 047P07Z, 047P0D1,<br>047P0D6, 047P0DZ, 047P0E6, 047P0EZ,<br>047P0F6, 047P0FZ, 047P0G6, 047P0GZ,<br>047P0Z1, 047P0Z6, 047P0ZZ, 047Q041,<br>047Q046, 047Q04Z, 047Q056, 047Q05Z,<br>047Q066, 047Q06Z, 047Q076, 047Q07Z,<br>047Q0D1, 047Q0D6, 047Q0DZ, 047Q0E6,<br>047Q0EZ, 047Q0F6, 047Q0FZ, 047Q0G6,<br>047Q0GZ, 047Q0Z1, 047Q0Z6, 047Q0ZZ,<br>047R041, 047R046, 047R04Z, 047R056,<br>047R05Z, 047R066, 047R06Z, 047R076,<br>047R07Z, 047R0D1, 047R0D6, 047R0DZ,<br>047R0E6, 047R0EZ, 047R0F6, 047R0FZ,<br>047R0G6, 047R0GZ, 047R0Z1, 047R0Z6, |
|--|--|--|--|----------------------------------------------------------------------------------------------------------------------------------------------------------------------------------------------------------------------------------------------------------------------------------------------------------------------------------------------------------------------------------------------------------------------------------------------------------------------------------------------------------------------------------------------------------------------------------------------------------------------------------------------------------------|

|  |  |  |  |                                                                                                                                                                                                                                                                                                                                                                                                                                                                                                                                                                                                                                                                |
|--|--|--|--|----------------------------------------------------------------------------------------------------------------------------------------------------------------------------------------------------------------------------------------------------------------------------------------------------------------------------------------------------------------------------------------------------------------------------------------------------------------------------------------------------------------------------------------------------------------------------------------------------------------------------------------------------------------|
|  |  |  |  | 047R0ZZ, 047S041, 047S046, 047S04Z, 047S056,<br>047S05Z, 047S066, 047S06Z, 047S076, 047S07Z,<br>047S0D1, 047S0D6, 047S0DZ, 047S0E6,<br>047S0EZ, 047S0F6, 047S0FZ, 047S0G6,<br>047S0GZ, 047S0Z1, 047S0Z6, 047S0ZZ,<br>047T041, 047T046, 047T04Z, 047T056,<br>047T05Z, 047T066, 047T06Z, 047T076,<br>047T07Z, 047T0D1, 047T0D6, 047T0DZ,<br>047T0E6, 047T0EZ, 047T0F6, 047T0FZ,<br>047T0G6, 047T0GZ, 047T0Z1, 047T0Z6,<br>047T0ZZ, 047U041, 047U046, 047U04Z,<br>047U056, 047U05Z, 047U066, 047U06Z,<br>047U076, 047U07Z, 047U0D1, 047U0D6,<br>047U0DZ, 047U0E6, 047U0EZ, 047U0F6,<br>047U0FZ, 047U0G6, 047U0GZ, 047U0Z1,<br>047U0Z6, 047U0ZZ, 047V041, 047V046, |
|--|--|--|--|----------------------------------------------------------------------------------------------------------------------------------------------------------------------------------------------------------------------------------------------------------------------------------------------------------------------------------------------------------------------------------------------------------------------------------------------------------------------------------------------------------------------------------------------------------------------------------------------------------------------------------------------------------------|

|  |  |  |  |                                                                                                                                                                                                                                                                                                                                                                                                                                                                                                                                                                                                                   |
|--|--|--|--|-------------------------------------------------------------------------------------------------------------------------------------------------------------------------------------------------------------------------------------------------------------------------------------------------------------------------------------------------------------------------------------------------------------------------------------------------------------------------------------------------------------------------------------------------------------------------------------------------------------------|
|  |  |  |  | 047V04Z, 047V056, 047V05Z, 047V066,<br>047V06Z, 047V076, 047V07Z, 047V0D1,<br>047V0D6, 047V0DZ, 047V0E6, 047V0EZ,<br>047V0F6, 047V0FZ, 047V0G6, 047V0GZ,<br>047V0Z1, 047V0Z6, 047V0ZZ, 047W041,<br>047W046, 047W04Z, 047W056, 047W05Z,<br>047W066, 047W06Z, 047W076, 047W07Z,<br>047W0D1, 047W0D6, 047W0DZ, 047W0E6,<br>047W0EZ, 047W0F6, 047W0FZ, 047W0G6,<br>047W0GZ, 047W0Z1, 047W0Z6, 047W0ZZ,<br>047Y041, 047Y046, 047Y04Z, 047Y056,<br>047Y05Z, 047Y066, 047Y06Z, 047Y076,<br>047Y07Z, 047Y0D1, 047Y0D6, 047Y0DZ,<br>047Y0E6, 047Y0EZ, 047Y0F6, 047Y0FZ,<br>047Y0G6, 047Y0GZ, 047Y0Z1, 047Y0Z6,<br>047Y0ZZ, |
|--|--|--|--|-------------------------------------------------------------------------------------------------------------------------------------------------------------------------------------------------------------------------------------------------------------------------------------------------------------------------------------------------------------------------------------------------------------------------------------------------------------------------------------------------------------------------------------------------------------------------------------------------------------------|

|                                                                                                                                                                                                                                                                                                                                                                                                                                                                                  |  |  |  |                                                                                                                                                                                                                                                                                                                                                                                                                   |
|----------------------------------------------------------------------------------------------------------------------------------------------------------------------------------------------------------------------------------------------------------------------------------------------------------------------------------------------------------------------------------------------------------------------------------------------------------------------------------|--|--|--|-------------------------------------------------------------------------------------------------------------------------------------------------------------------------------------------------------------------------------------------------------------------------------------------------------------------------------------------------------------------------------------------------------------------|
|                                                                                                                                                                                                                                                                                                                                                                                                                                                                                  |  |  |  | <p>04RK07Z, 04RK0JZ, 04RK0KZ, 04RL07Z,<br/> 04RL0JZ, 04RL0KZ, 04RM07Z, 04RM0JZ,<br/> 04RM0KZ, 04RN07Z, 04RN0JZ, 04RN0KZ,<br/> 04RP07Z, 04RP0JZ, 04RP0KZ, 04RQ07Z,<br/> 04RQ0JZ, 04RQ0KZ, 04RR07Z, 04RR0JZ,<br/> 04RR0KZ, 04RS07Z, 04RS0JZ, 04RS0KZ,<br/> 04RT07Z, 04RT0JZ, 04RT0KZ, 04RU07Z,<br/> 04RU0JZ, 04RU0KZ, 04RV07Z, 04RV0JZ,<br/> 04RV0KZ, 04RW07Z, 04RW0JZ, 04RW0KZ,<br/> 04RY07Z, 04RY0JZ, 04RY0KZ</p> |
| <p>Abbreviations: ICD-9-CM, International Classification of Disease, 9th revision, Clinical Modification; ICD-10-CM, International Classification of Disease, 10th revision, Clinical Modification; AAA, abdominal aortic aneurysm; TIA, transient ischemic attack; PAD, peripheral artery disease; endo, endovascular</p> <p><sup>a</sup> ICD-10-CM codes were identified using forward and backward mapping to the Generalized Equivalence Mappings (GEMs) provided by CMS</p> |  |  |  |                                                                                                                                                                                                                                                                                                                                                                                                                   |

**Supplemental Table 2.** Sex-Specific Prevalence of AAA, CAS, and PAD.

| <b>Vascular Disease</b> | <b>Males</b> | <b>Females</b> |
|-------------------------|--------------|----------------|
| AAA <sup>1</sup>        | 3.0%         | 1.0%           |
| CAS <sup>14</sup>       | 3.8%         | 2.7%           |
| PAD <sup>15</sup>       | 4.3%         | 4.3%           |
